# Supplementary material for: Prognostic significance of controlling nutritional status score for patients with gastric cancer: A systematic review and meta‑analysis
Source: PubMed Central journal article supplement — Exp Ther Med. 2023 Mar 21;25(5):202. doi: 10.3892/etm.2023.11901 (PMC10119667; doi:10.3892/etm.2023.11901), 2023-03-21

Figure S1. Funnel plot for overall survival.

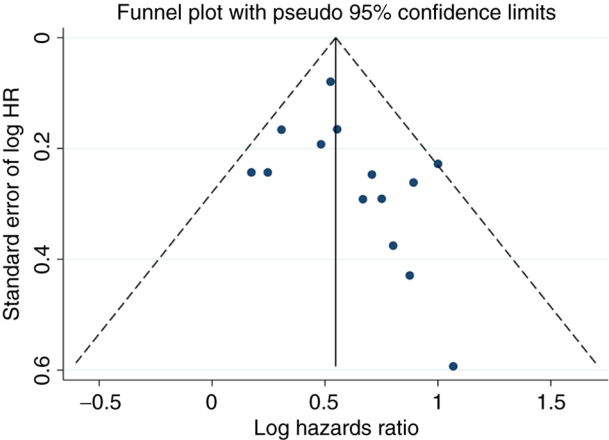

Figure S2. Funnel plot for recurrence-free survival.

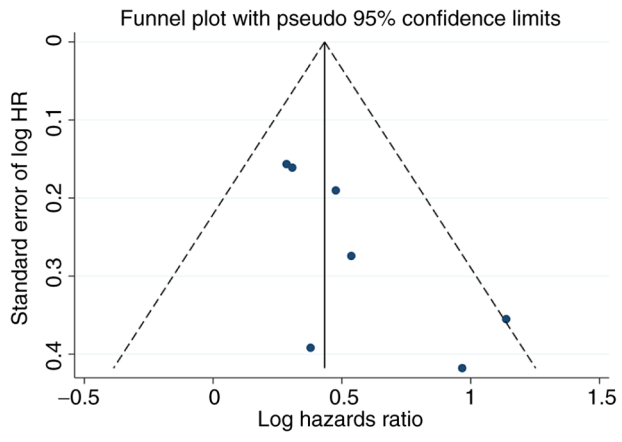

Figure S3. Funnel plot for cancer-specific survival.

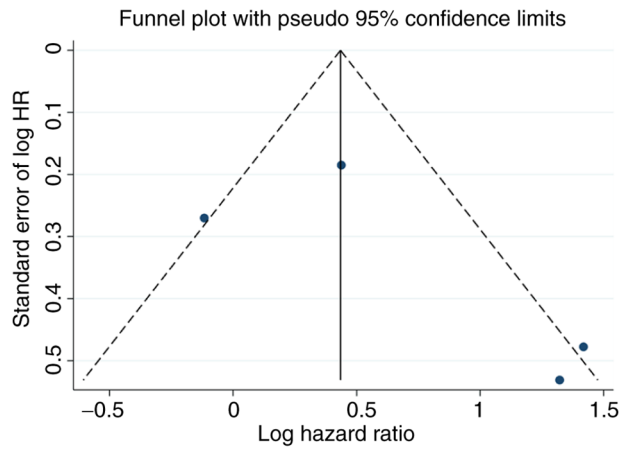

Figure S4. Funnel plot for risk of having T3 or T4 tumour status.

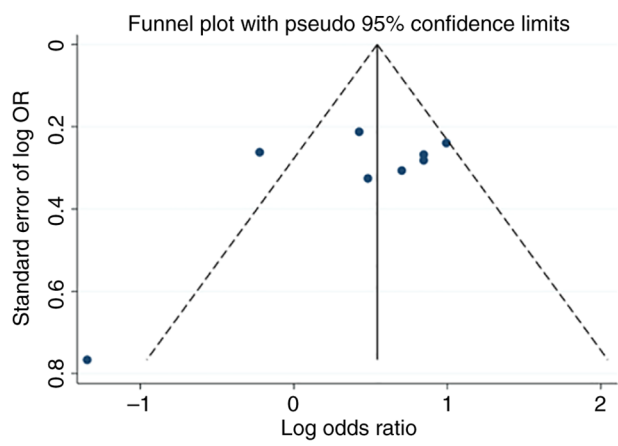

Figure S5. Funnel plot for risk of having N 2 or N3 nodal status.

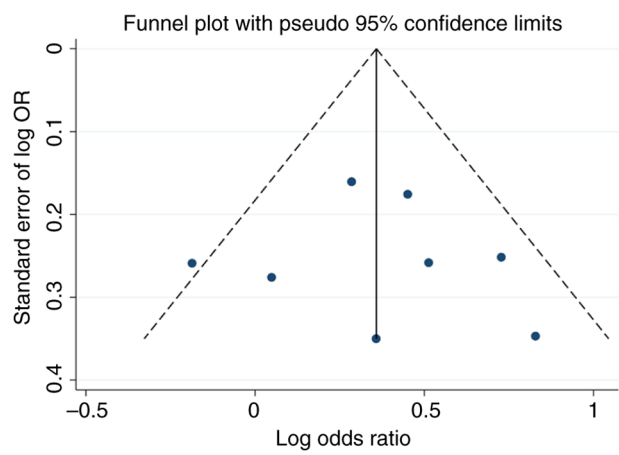

Figure S6. Funnel plot for risk of having stage III or stage IV tumour.

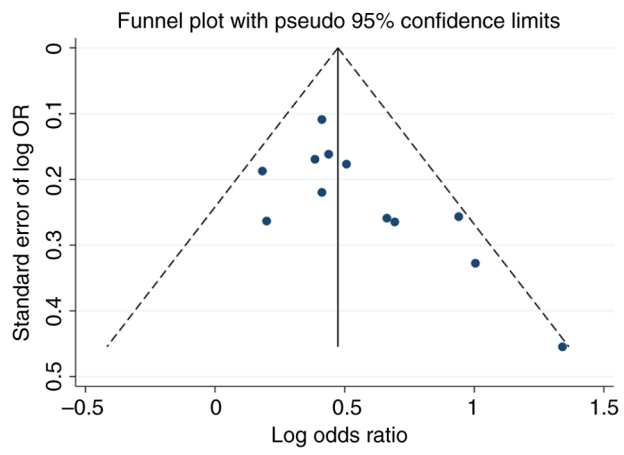

Figure S7. Funnel plot for risk of microvascular invasion.

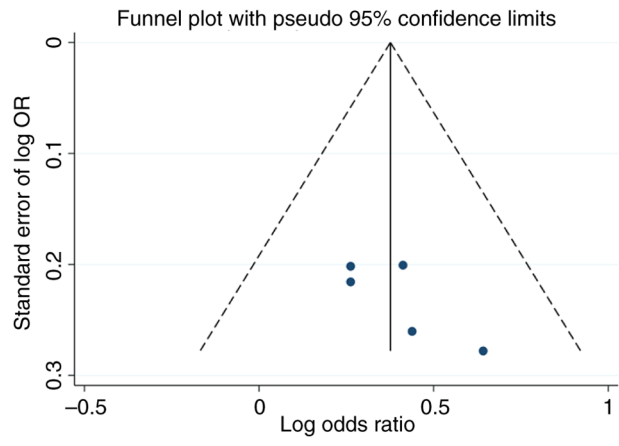

Figure S8. Funnel plot for risk of post-operative complications.

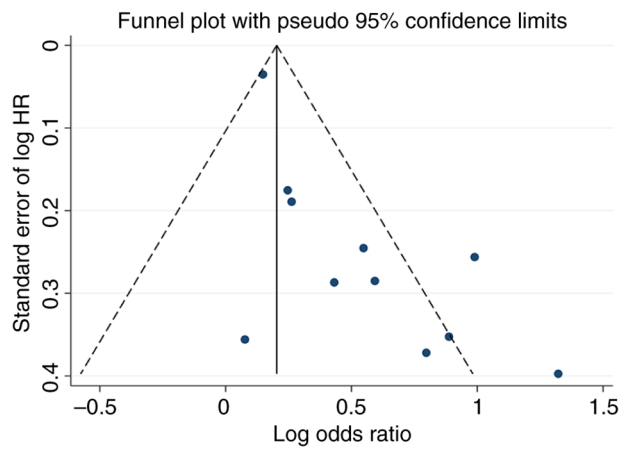

Supplement: Supplementary_Data1.pdf [file Supplementary_Data1.pdf]
