# Supplementary material for: Prognostic significance of controlling nutritional status score for patients with gastric cancer: A systematic review and meta‑analysis
Source: PubMed Central journal article supplement — Exp Ther Med. 2023 Mar 21;25(5):202. doi: 10.3892/etm.2023.11901 (PMC10119667; doi:10.3892/etm.2023.11901), 2023-03-21
Supplement: Supplementary_Data2.pdf [file Supplementary_Data2.pdf]

Appendix. Search strategy for identification of studies to be included in the review.

Search strategy

- i) Controlling nutritional status score OR CONUT OR immune-nutritional biomarker OR serum albumin OR total cholesterol OR lymphocyte count.
- ii) Stomach tumor OR gastric tumor OR gastric neoplasm OR gastric malignancy OR gastric carcinoma OR gastric adenocarcinoma)
- iii) Outcomes OR mortality OR survival OR recurrence OR prognosis OR prognostic
- iv) (#1 AND #2 AND #3)
- v) (Addresses[ptyp] OR Autobiography[ptyp] OR Bibliography[ptyp] OR Biography[ptyp] OR pubmed books[filter] OR Case Reports[ptyp] OR Congresses[ptyp] OR Consensus Development Conference[ptyp] OR Directory[ptyp] OR Duplicate Publication[ptyp] OR Editorial[ptyp] OR Systematic reviews OR Meta-analysis OR Festschrift[ptyp] OR Guideline[ptyp] OR In Vitro[ptyp] OR Interview[ptyp] OR Lectures [ptyp] OR Legal Cases[ptyp] OR News[ptyp] OR Newspaper Article[ptyp] OR Personal Narratives [ptyp] OR Portraits[ptyp] OR Retracted Publication[ ptyp] OR Twin Study[ptyp] OR Video-Audio Media[ptyp])
- vi) (#4 NOT #5)

Table SI. Author's judgements about study quality using the adapted Ottawa-Newcastle Risk of Bias Assessment tool.

| Parameter                                                                                                                                                           | Zhu <i>et al</i> (12) | Galizia <i>et al</i> (13) | Sun <i>et al</i> (14) | Qian <i>et al</i> (15) | Jin <i>et al</i> (16) | Akagunduz <i>et al</i> (17) | Lin <i>et al</i> (18) | Huang <i>et al</i> (19) |
|---------------------------------------------------------------------------------------------------------------------------------------------------------------------|-----------------------|---------------------------|-----------------------|------------------------|-----------------------|-----------------------------|-----------------------|-------------------------|
| Representativeness/appropriateness of participant selection<br>Random or consecutive recruitment=Y<br>Convenience sample=N<br>Not reported or unclear               | Y                     | Y                         | Y                     | Y                      | Y                     | Y                           | Y                     | Y                       |
| Control for baseline differences in cohorts<br>Similarity of groups at baseline or adjustment in analyses=Y<br>No attempt to control or adjust=N<br>Not reported=NR | Y                     | Y                         | N                     | Y                      | Y                     | Y                           | Y                     | Y                       |
| Loss to follow-up<br>Explanation provided for loss of participants and/or intention to treat=Y<br>No explanation =N                                                 | Y                     | Y                         | Y                     | Y                      | Y                     | N                           | Y                     | Y                       |
| Masking of exposure to outcomes assessor<br>Description of masking=Y<br>No masking or no description =N                                                             | Y                     | Y                         | Y                     | Y                      | Y                     | Y                           | Y                     | Y                       |
| Ascertainment of condition<br>Description of ascertainment/diagnostic criteria=Y<br>No description or patient self-report=N                                         | Y                     | Y                         | Y                     | Y                      | Y                     | Y                           | Y                     | Y                       |
| Documentation of other treatment modalities<br>Documentation=Y<br>No documentation=N                                                                                | Y                     | Y                         | Y                     | Y                      | Y                     | Y                           | N                     | Y                       |

|                                                                                                                                                                                                       |   |   |   |   |   |   |   |   |
|-------------------------------------------------------------------------------------------------------------------------------------------------------------------------------------------------------|---|---|---|---|---|---|---|---|
| Extent to which valid outcomes are described<br>Adequate description of outcome=Y<br>Insufficient detail regarding outcome or follow-up time=N                                                        | Y | Y | Y | Y | N | Y | Y | Y |
| Pre-specification of harms, mode of harms collection<br>Description of a list of harms assessed or monitoring=Y<br>No such description or passive harms collection=N<br>No adverse events reported=NA | Y | Y | Y | N | Y | Y | Y | Y |
| Financial Conflict of interest (COI)<br>Funding source reported=Y<br>Funding source not reported=N                                                                                                    | Y | Y | Y | Y | Y | N | Y | Y |

Table SI continued. Author's judgements about study quality using the adapted Ottawa-Newcastle Risk of Bias Assessment tool.

| Parameter                                                                                                                                                           | Jeon <i>et al</i> (20) | Hirahara <i>et al</i> (21) | Kuroda <i>et al</i> (22) | Zheng <i>et al</i> (23) | Liu <i>et al</i> (24) | Ryo <i>et al</i> (25) | Suzuki <i>et al</i> (26) | Xiao <i>et al</i> (27) | Aoyama <i>et al</i> (28) |
|---------------------------------------------------------------------------------------------------------------------------------------------------------------------|------------------------|----------------------------|--------------------------|-------------------------|-----------------------|-----------------------|--------------------------|------------------------|--------------------------|
| Representativeness/appropriateness of participant selection<br>Random or consecutive recruitment=Y<br>Convenience sample=N<br>Not reported or unclear               | Y                      | Y                          | Y                        | Y                       | Y                     | Y                     | Y                        | Y                      | Y                        |
| Control for baseline differences in cohorts<br>Similarity of groups at baseline or adjustment in analyses=Y<br>No attempt to control or adjust=N<br>Not reported=NR | Y                      | Y                          | Y                        | Y                       | Y                     | N                     | Y                        | Y                      | Y                        |
| Loss to follow-up<br>Explanation provided for loss of participants and/or intention to treat=Y<br>No explanation =N                                                 | Y                      | Y                          | Y                        | Y                       | N                     | Y                     | Y                        | Y                      | N                        |
| Masking of exposure to outcomes assessor<br>Description of masking=Y<br>No masking or no description =N                                                             | Y                      | N                          | Y                        | Y                       | Y                     | Y                     | Y                        | Y                      | Y                        |
| Ascertainment of condition<br>Description of ascertainment/diagnostic criteria=Y<br>No description or patient self-report=N                                         | Y                      | Y                          | Y                        | Y                       | Y                     | Y                     | Y                        | Y                      | Y                        |

|                                                                                                                                                                                                       |   |   |   |   |   |   |   |   |   |
|-------------------------------------------------------------------------------------------------------------------------------------------------------------------------------------------------------|---|---|---|---|---|---|---|---|---|
| Documentation of other treatment modalities<br>Documentation=Y<br>No documentation=N                                                                                                                  | Y | Y | Y | Y | Y | Y | Y | Y | Y |
| Extent to which valid outcomes are described<br>Adequate description of outcome=Y<br>Insufficient detail regarding outcome or follow-up time=N                                                        | Y | Y | Y | Y | Y | Y | Y | Y | Y |
| Pre-specification of harms, mode of harms collection<br>Description of a list of harms assessed or monitoring=Y<br>No such description or passive harms collection=N<br>No adverse events reported=NA | N | Y | Y | Y | Y | N | Y | Y | Y |
| Financial Conflict of interest (COI)<br>Funding source reported=Y<br>Funding source not reported=N                                                                                                    | Y | Y | Y | Y | Y | Y | Y | Y | Y |

Table SII. Findings of the Eggers test for the outcomes.

| Outcomes                       | Number of studies | Bias with 95% confidence interval | P-value |
|--------------------------------|-------------------|-----------------------------------|---------|
| Overall survival               | 14                | 0.78 (-0.46, 2.02)                | 0.19    |
| Recurrence free survival       | 7                 | 2.22 (-1.18, 4.25)                | 0.38    |
| Cancer specific survival       | 4                 | 2.69 (-7.12, 12.5)                | 0.36    |
| T3 or T4 tumor status          | 8                 | -2.75 (-8.27, 2.77)               | 0.27    |
| N2 or N3 nodal status          | 8                 | 0.46 (-3.81, 4.72)                | 0.80    |
| Stage III or stage IV tumor    | 12                | 2.03 (-1.24, 3.82)                | 0.30    |
| Poor tumour differentiation    | 9                 | 3.31 (-1.21, 6.83)                | 0.16    |
| Microvascular invasion         | 5                 | 3.33 (-1.83, 8.49)                | 0.13    |
| Need for adjuvant chemotherapy | 5                 | -0.32 (-10.2, 9.5)                | 0.92    |
| Post-operative complications   | 11                | 1.78 (0.84, 2.72)                 | 0.002   |
